# Supplementary material for: Comparative Analysis of Herbaceous and Woody Cell Wall Digestibility by Pathogenic Fungi
Source: MDPI journal article supplement (doi:10.3390/molecules26237220), 2021-11-28
Supplement: s1 [file s1]

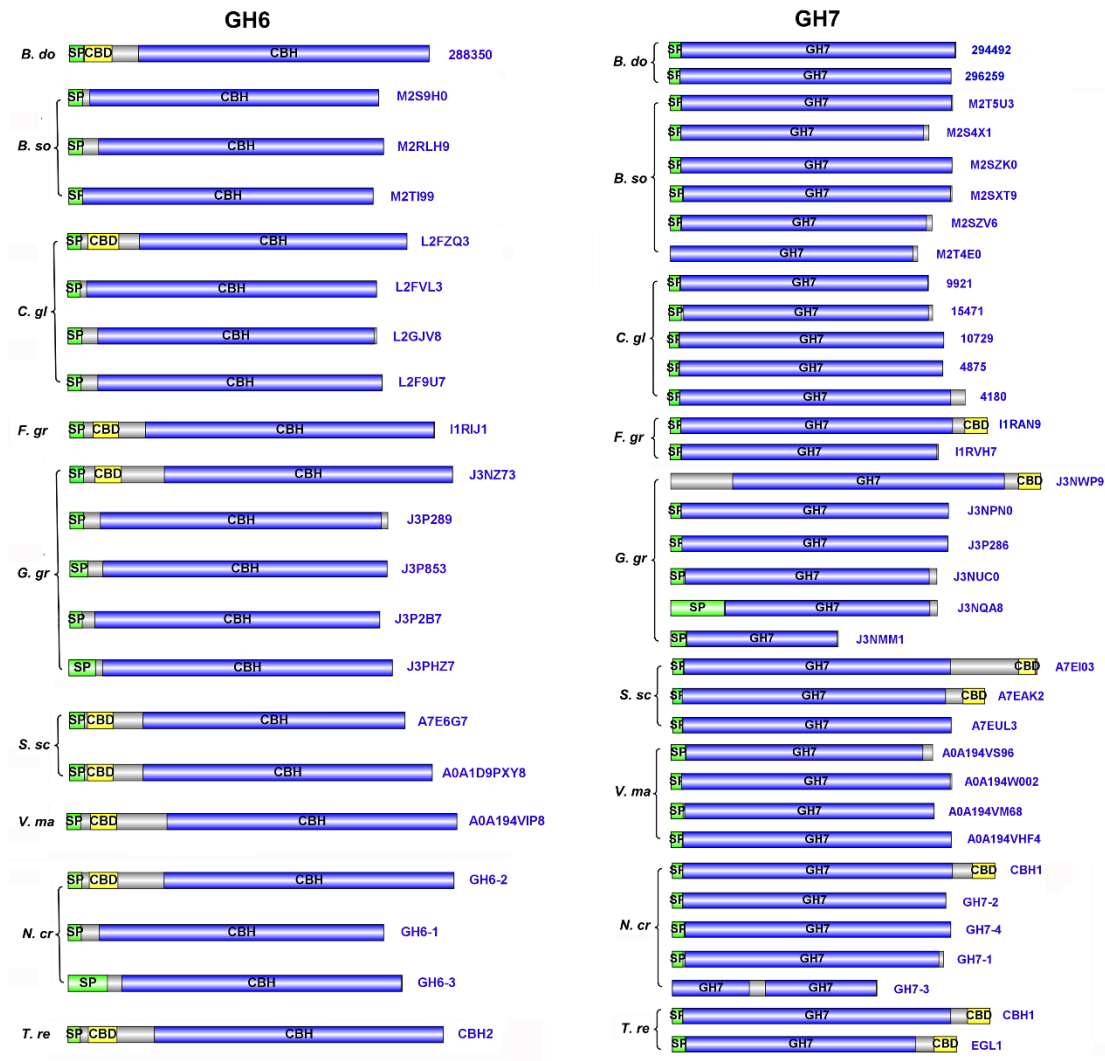

Figure S1. CBD organization in GH6 and GH7 cellulases.

|                             |        |        |        |        |        |        |        |        |        |        |        |        |        |        |        |        |
|-----------------------------|--------|--------|--------|--------|--------|--------|--------|--------|--------|--------|--------|--------|--------|--------|--------|--------|
| 1: S.Sc_A7EI03_GH7_CBD      | 100.00 | 48.39  | 40.62  | 50.00  | 43.75  | 28.12  | 40.62  | 40.62  | 37.50  | 50.00  | 43.75  | 37.50  | 37.50  | 34.38  | 43.75  | 40.62  |
| 2: S.Sc_A7EAK2_GH7_CBD      | 48.39  | 100.00 | 44.74  | 45.95  | 54.05  | 37.84  | 48.65  | 48.65  | 45.95  | 52.63  | 44.74  | 45.95  | 48.65  | 36.84  | 48.65  | 51.35  |
| 3: N.cr_CBH1_GH7_CBD        | 40.62  | 44.74  | 100.00 | 52.63  | 55.26  | 31.58  | 47.37  | 47.37  | 44.74  | 51.28  | 51.28  | 44.74  | 44.74  | 38.46  | 34.21  | 44.74  |
| 4: G.gr_J3NWP9_GH7_CBD      | 50.00  | 45.95  | 52.63  | 100.00 | 57.89  | 31.58  | 52.63  | 52.63  | 55.26  | 57.89  | 44.74  | 42.11  | 39.47  | 39.47  | 52.63  | 50.00  |
| 5: F.gr_I1RAN9_GH7_CBD      | 43.75  | 54.05  | 55.26  | 57.89  | 100.00 | 31.58  | 47.37  | 47.37  | 50.00  | 57.89  | 55.26  | 47.37  | 47.37  | 55.26  | 44.74  | 57.89  |
| 6: C.gl_L2FZQ3_GH6_CBD      | 28.12  | 37.84  | 31.58  | 31.58  | 31.58  | 100.00 | 47.37  | 47.37  | 36.84  | 36.84  | 36.84  | 57.89  | 60.53  | 44.74  | 50.00  | 50.00  |
| 7: S.Sc_A7E6G7_GH6_CBD      | 40.62  | 48.65  | 47.37  | 52.63  | 47.37  | 47.37  | 100.00 | 100.00 | 65.79  | 55.26  | 55.26  | 60.53  | 55.26  | 47.37  | 60.53  | 60.53  |
| 8: S.sc_A0A1D9PXY8_GH6_CBD  | 40.62  | 48.65  | 47.37  | 52.63  | 47.37  | 47.37  | 100.00 | 100.00 | 65.79  | 55.26  | 55.26  | 60.53  | 55.26  | 47.37  | 60.53  | 60.53  |
| 9: B.do_288350_GH6_CBD      | 37.50  | 45.95  | 44.74  | 55.26  | 50.00  | 36.84  | 65.79  | 65.79  | 100.00 | 52.63  | 47.37  | 52.63  | 44.74  | 47.37  | 57.89  | 55.26  |
| 10: T.re_CBH1_GH7_CBD       | 50.00  | 52.63  | 51.28  | 57.89  | 57.89  | 36.84  | 55.26  | 55.26  | 52.63  | 100.00 | 71.79  | 52.63  | 50.00  | 38.46  | 50.00  | 57.89  |
| 11: T.re_EGL1_GH7_CBD       | 43.75  | 44.74  | 51.28  | 44.74  | 55.26  | 36.84  | 55.26  | 55.26  | 47.37  | 71.79  | 100.00 | 55.26  | 55.26  | 51.28  | 55.26  | 63.16  |
| 12: N.cr_GH6-2_GH6_CBD      | 37.50  | 45.95  | 44.74  | 42.11  | 47.37  | 57.89  | 60.53  | 60.53  | 52.63  | 52.63  | 55.26  | 100.00 | 71.05  | 60.53  | 60.53  | 65.79  |
| 13: G.gr_J3NZ73_GH6_CBD     | 37.50  | 48.65  | 44.74  | 39.47  | 47.37  | 60.53  | 55.26  | 55.26  | 44.74  | 50.00  | 55.26  | 71.05  | 100.00 | 57.89  | 63.16  | 68.42  |
| 14: F.gr_I1RIJ1_GH6_CBD     | 34.38  | 36.84  | 38.46  | 39.47  | 55.26  | 44.74  | 47.37  | 47.37  | 47.37  | 38.46  | 51.28  | 60.53  | 57.89  | 100.00 | 52.63  | 68.42  |
| 15: V.ma_A0A194VIP8_GH6_CBD | 43.75  | 48.65  | 34.21  | 52.63  | 44.74  | 50.00  | 60.53  | 60.53  | 57.89  | 50.00  | 55.26  | 60.53  | 63.16  | 52.63  | 100.00 | 68.42  |
| 16: T.re_CBH2_GH6_CBD       | 40.62  | 51.35  | 44.74  | 50.00  | 57.89  | 50.00  | 60.53  | 60.53  | 55.26  | 57.89  | 63.16  | 65.79  | 68.42  | 68.42  | 68.42  | 100.00 |

Figure S2. Identity in sequence alignment of CBDs from GH6 and GH7 cellulases.
